# Supplementary material
Source: PubMed Central journal article supplement (PMC6657808)
Supplement: NIHMS1024631-supplement-2.pdf [file NIHMS1024631-supplement-2.pdf]

## **Supplementary Information**

### **Structural basis for the bypass of the major oxaliplatin-DNA adducts by human DNA polymerase $\eta$**

Hala Ouzon-Shubeita, Meghan Baker, Myong-Chul Koag and Seongmin Lee\*

Division of Chemical Biology and Medicinal Chemistry, College of Pharmacy,

The University of Texas at Austin, Austin, TX 78750, USA

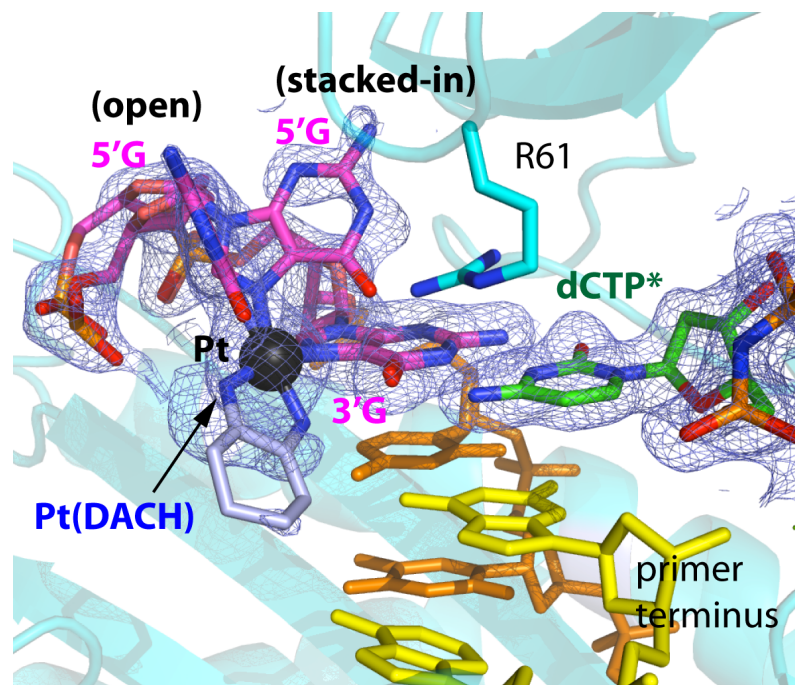

**Figure S1. Structure of Polη incorporating dCTP opposite the 3'G of the Pt(DACH)GpG adducts.** A  $2F_o - F_c$  electron density map contoured at  $1\sigma$  around the Pt(DACH):dCTP\* base pair. Pt is shown in black sphere. The 5'G of the Pt(DACH)GpG exists as a mixture of an “open” and “stacked-in” conformations.

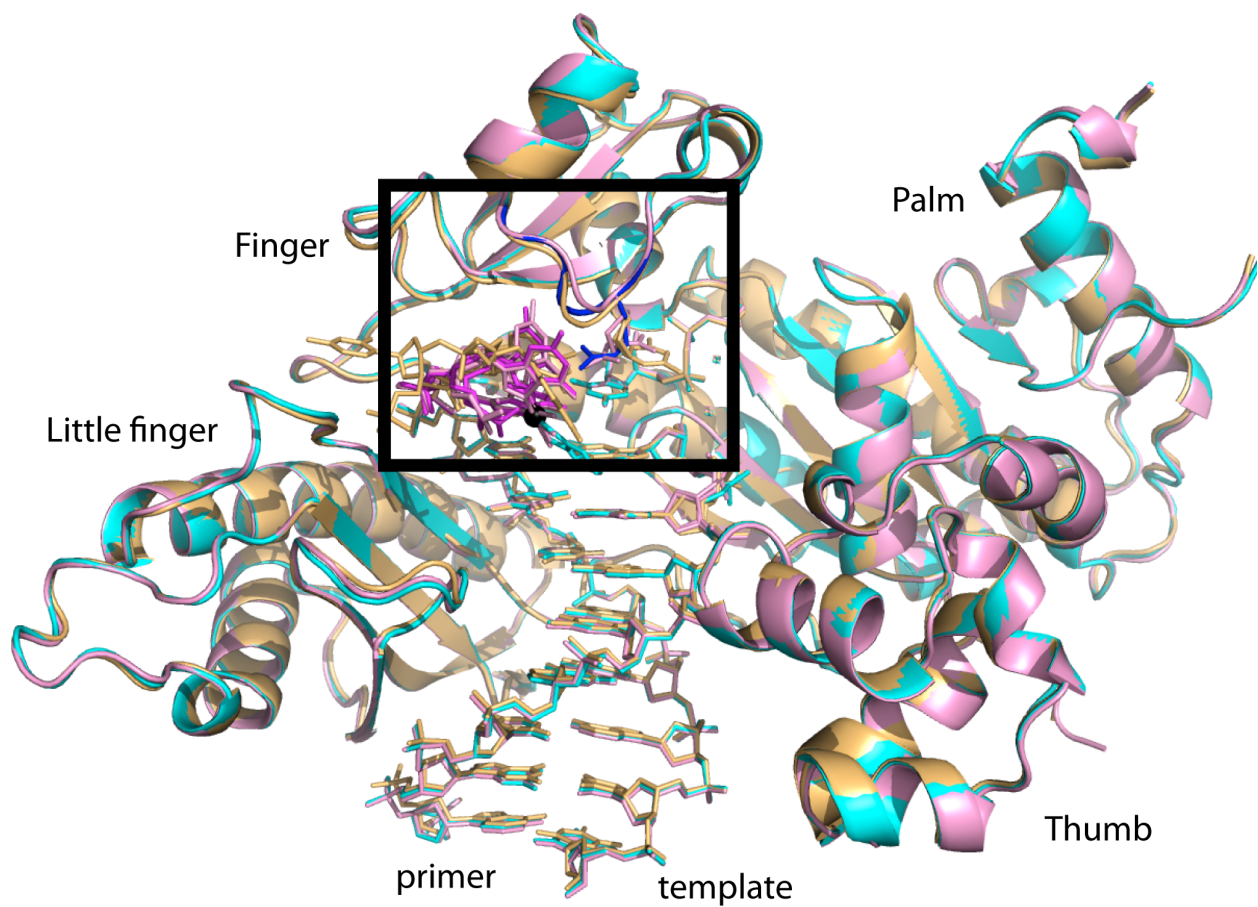

**Figure S2. Superposition of structures of Polη incorporating dCTP opposite the 3'G, Pt(NH<sub>3</sub>)<sub>2</sub>-3'G, and Pt(DACH)-3'G.** Pt(DACH)-3'G·dCTP\* (cyan), Pt(NH<sub>3</sub>)<sub>2</sub>-3'G·dCTP\* (pink, PDB ID: 4DL4 [39]), and normal-3'G·dCTP\* (green, PDB ID: 4DL2 [39]) are colored in cyan, pink, and gold, respectively. Pt(DACH)GpG is shown in magenta. The region containing the Val59-Trp64 loop of the finger domain, platinumated GpG, and incoming dCTP is shown in a box.
